# Supplementary material for: Effects of conservation policy on China’s forest recovery
Source: PubMed Central journal article supplement — Sci Adv. 2016 Mar 18;2(3):e1500965. doi: 10.1126/sciadv.1500965 (PMC4803489; doi:10.1126/sciadv.1500965), 2016-03-18
Supplement: 1500965_SM.pdf [file 1500965_SM.pdf]

## Supplementary Materials for **Effects of conservation policy on China's forest recovery**

Andrés Viña, William J. McConnell, Hongbo Yang, Zhenci Xu, Jianguo Liu

Published 18 March 2016, *Sci. Adv.* **2**, e1500965 (2016)  
DOI: 10.1126/sciadv.1500965

### **The PDF file includes:**

- Fig. S1. Histogram of dynamic pixels.
- Fig. S2. Distribution of validation polygons.
- Fig. S3. Validation of the MODIS VCF.
- Fig. S4. Distribution of model residuals.

### Supplementary Materials

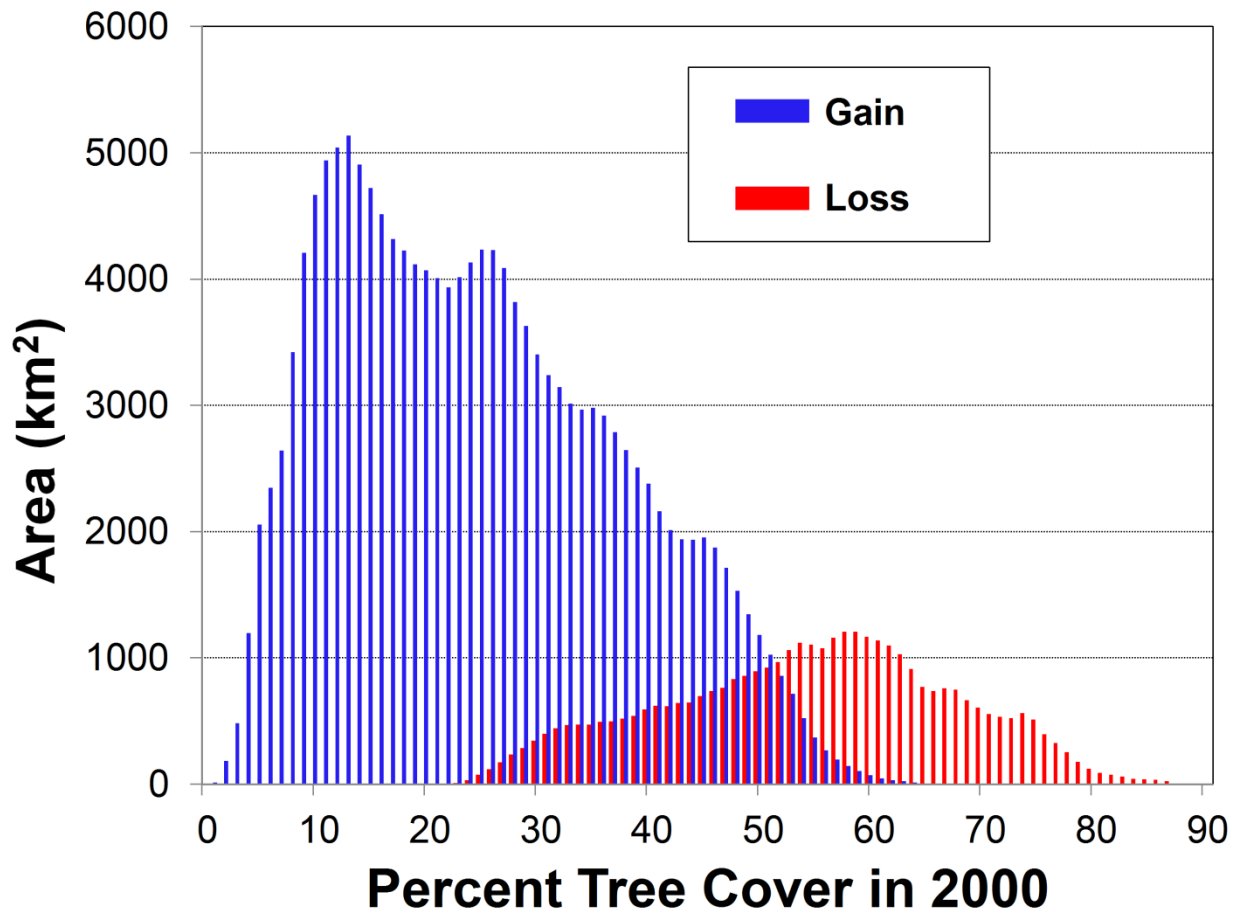

**Fig. S1. Histogram of dynamic pixels.** Frequency histograms of the percent tree cover in 2000 of the pixels exhibiting statistically significant forest cover gain/loss across the 2000-2010 time period.

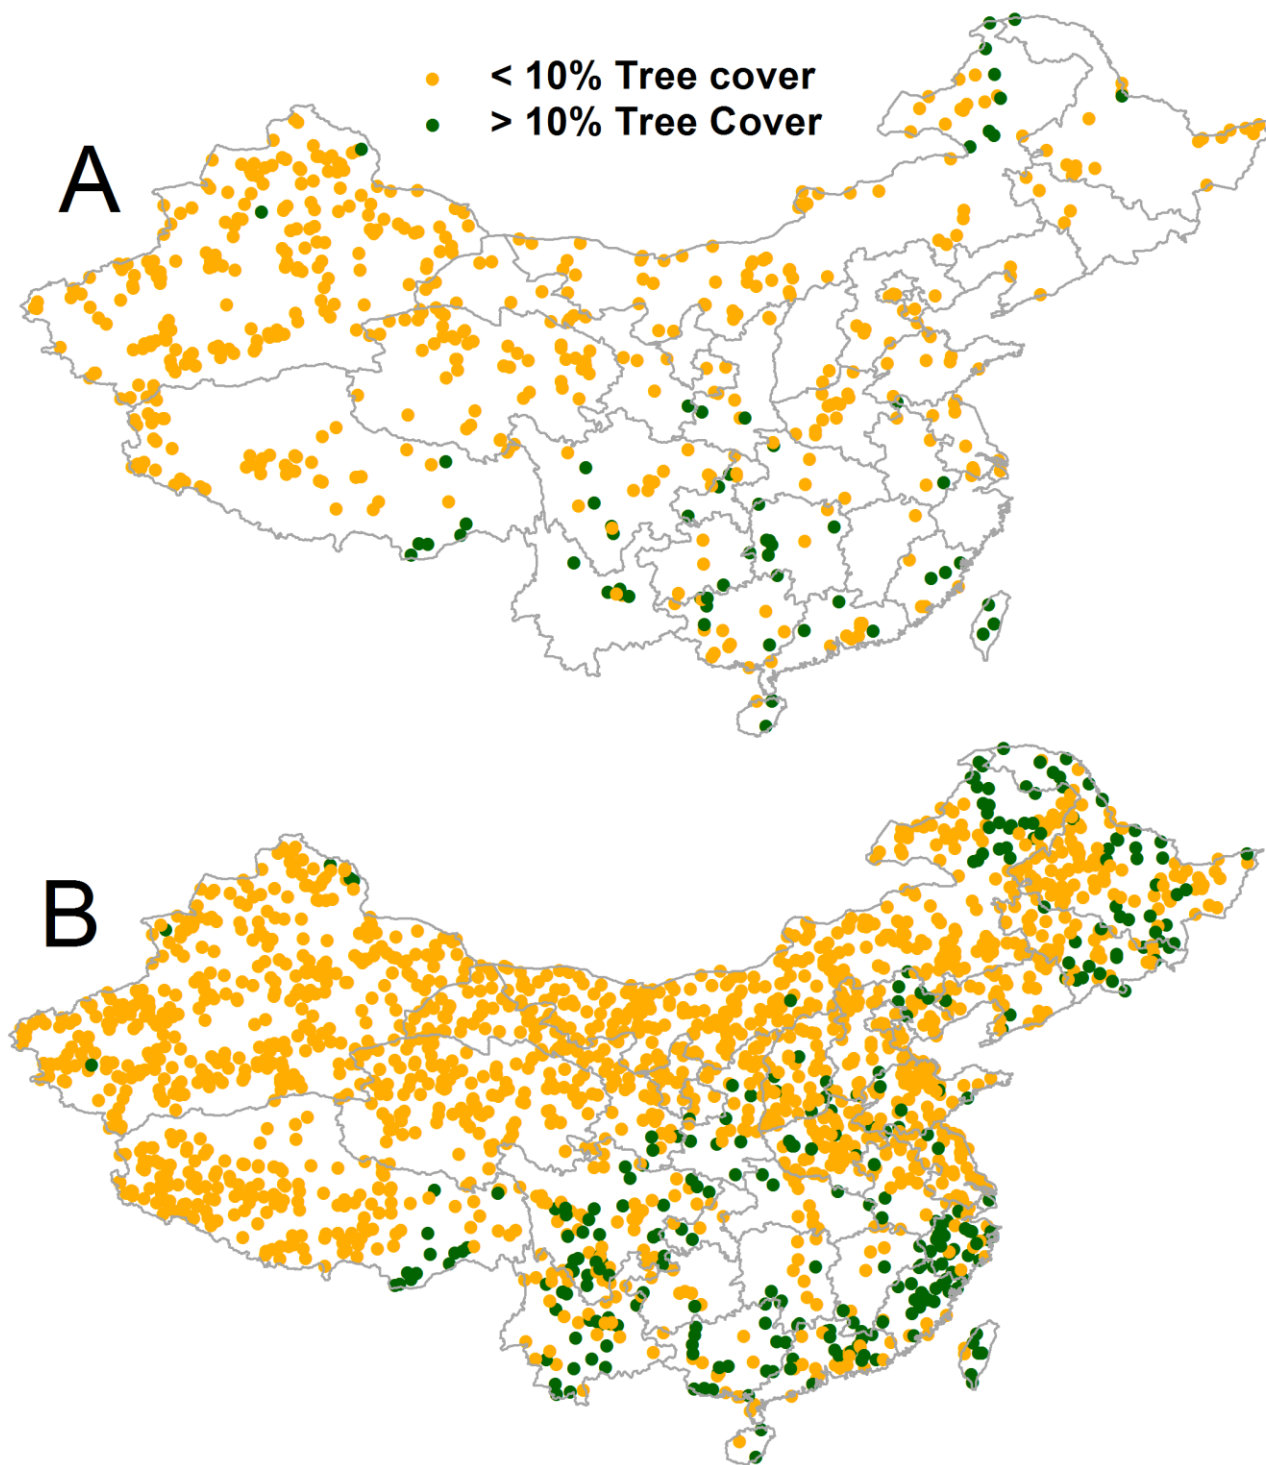

**Fig. S2. Distribution of validation polygons.** Locations of polygons randomly distributed throughout China used for validating the MODIS VCF tree cover product of (A) 2000 and (B) 2010. Polygons correspond to province boundaries.

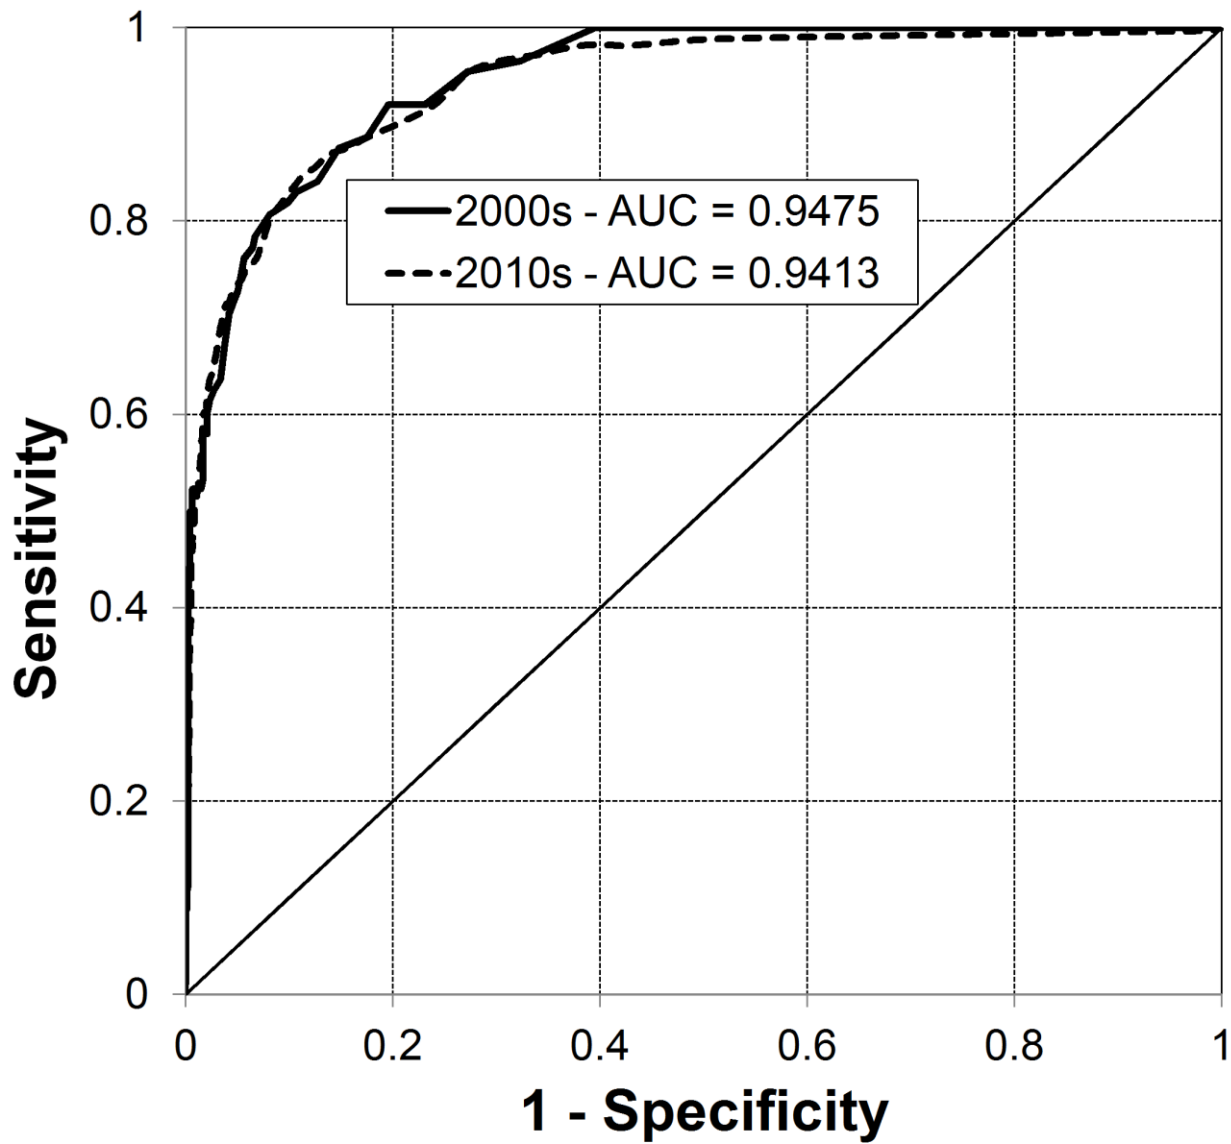

**Fig. S3. Validation of the MODIS VCF.** Results of the threshold independent validation procedure (Area Under the Receiver Operating Characteristic curve; AUC) of the MODIS VCF tree cover datasets of 2000 and 2010. The 45-degree line represents an AUC = 0.5 (i.e., random prediction).

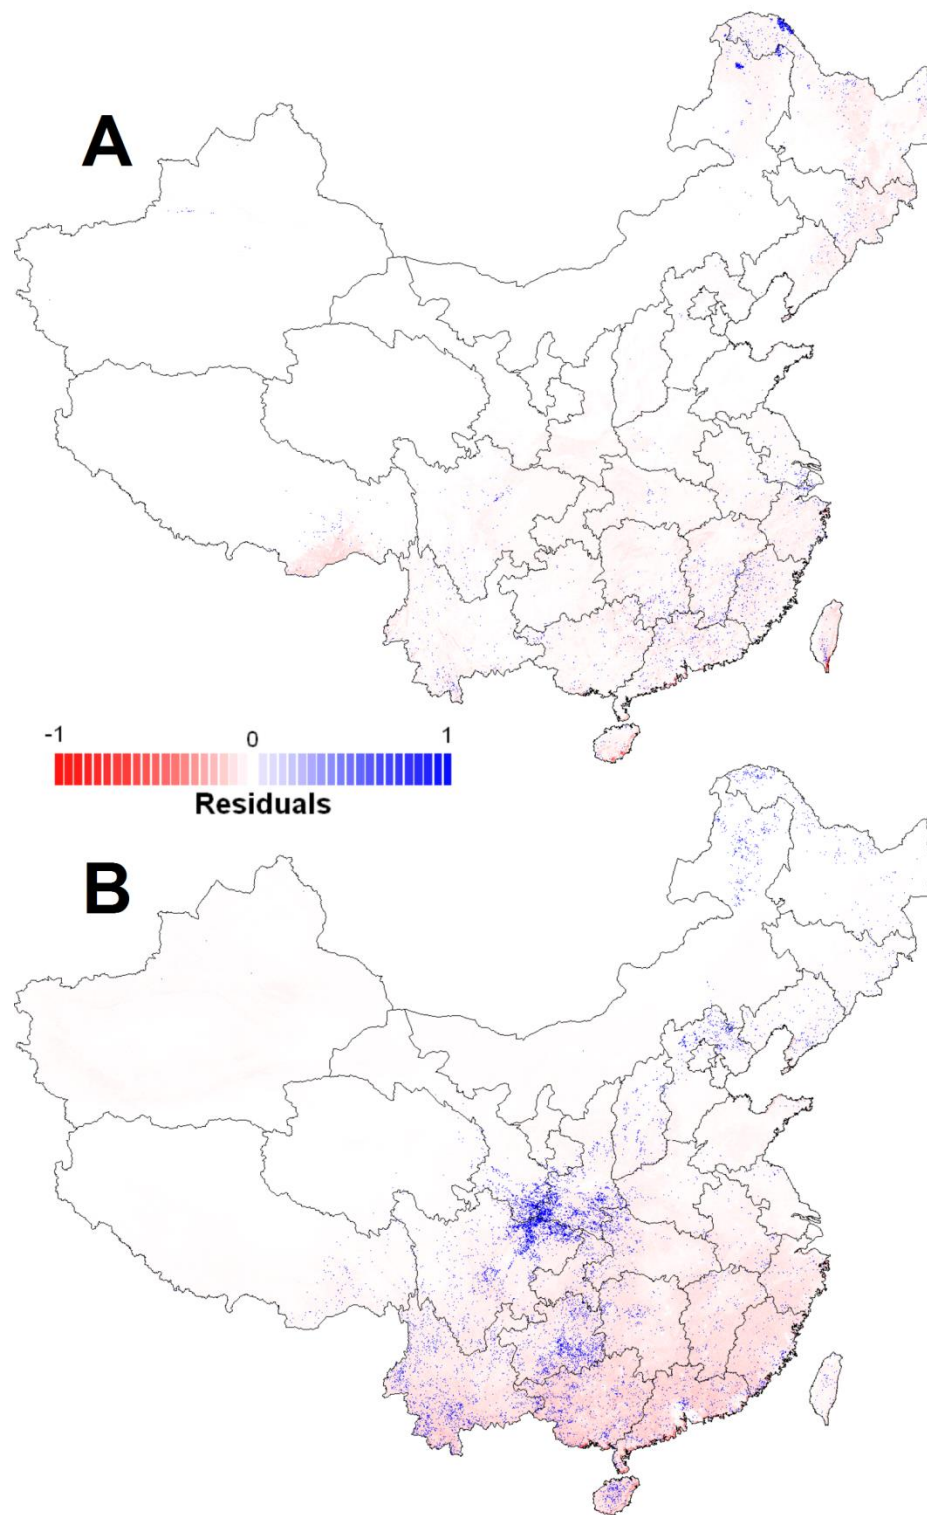

**Fig. S4. Distribution of model residuals.** Residuals of logistic regression models developed to assess the probability of (A) forest loss and (B) forest gain, using eleven pixel-based biophysical and demographic variables (coefficients are shown in Tables 1 and 2, respectively, in the main text) as independent predictors.
